# Supplementary material
Source: Research Square preprint supplement (doi:10.21203/rs.3.rs-9072391/v1)
Supplement: Supplementary file 1 [file 329f29642ef25f21384d3c46.docx]

**Appendix B. Description and Justification for the Use of Feasibility Indicators by SETS Domains**

1. Social feasibility

**a.** **Current land use**

*Description of the raster map*

| Land Use | Green Roofs | Rain garden | Porous pavement | Urban parks |
| --- | --- | --- | --- | --- |
| Existing urban parks and gardens | 0 | 1 | 0 | 0 |
| Parking lots | 0 | 0 | 1 | 0.5 |
| Buildings | 1 | 0 | 0 | 0 |
| Roads | 0 | 0 | 1 | 0.5 |
| Railroad  track | 0 | 0 | 0 | 0 |
| Sidewalk | 0 | 0 | 0 | 0 |
| Sport fields | 0 | 0 | 0 | 0 |
| Green area (which is not park) | 0 | 1 | 0 | 0 |

Table 1: Overview of Land use allocation possibilities for the different NBS. (1 -feasible, 0- not feasible) add literature

*Rationale*

Changing current land-use has been identified as a barrier to NBS implementation (Johns, 2019). For example NBS are less socially accepted by certain groups in society when they reduce parking lots (Everett et al., 2018). Building on this, we assume that unused land may be easier to transform whereas major changes in function will make a development less likely. Nevertheless, we don’t rule out functional changes as impossible, since changes might lead to perceived benefits and usage patterns can vary in the future.

**b.** **Social acceptance**

*Description of the raster map*

| **Feasibility** | **Value** |
| --- | --- |
| 1 | High support (more than 38%) of party with green agenda |
| 0.5 | Low support (less than 38%) of party with green agenda |

*Rationale*

The acceptance of NBS by local citizens is crucial for their effective implementation in public and private spaces. To assess social acceptance of NBS, voting data were analyzed for each city based on the environmental agendas of political parties.

For Barcelona, data from the 2023 mayoral elections were analyzed, focusing on parties with pro-green environmental agendas, such as BCOMU, ERC, and CUP. For Rotterdam, voting data from the 2023 national elections were categorized into supportive and opposing parties. These categories were determined based on a motion submitted to the Dutch Parliament in April 2021 regarding the inclusion of additional green infrastructure in urban environments. Supportive parties included GroenLinks-PvdA, BIJ1, Volt, DENK, PvdD, D66, ChristenUnie, and JA21, while opposing parties were NSC, VVD, SGP, CDA, PVV, FVD, and BBB.

For Boston, data from the 2024 presidential election were used, considering Democrats as supportive of environmental initiatives and Republicans as opposing. Neighborhoods where more than 38% of votes were for the supportive parties received a feasibility score of 1, while areas with less than 38% support received a score of 0.5.

**c. Administrative suitability of buildings rooftops**

*Description of the raster map*

| **Feasibility** | **Value** |
| --- | --- |
| 1 | Rest |
| 0 | Industrial warehouses​, Parking lots​, Plots under construction​, Sports areas, Open-air passage areas with defined use,​ such as terraces of cafes/bars​, Patios and gardens |

*Rationale*

The indicator based on ownership of land and property serves as a rational approach due to the recognized barrier it poses to the implementation of NBS. Studies by Johns (2019) and Sarabi et al. (2020) have underscored the reluctance of private landowners to prioritize NBS implementation, often favoring financial considerations over long-term sustainability goals. Moreover, the fragmentation of land ownership among numerous private landowners further complicates NBS implementation efforts. Despite these challenges, targeting private land for NBS implementation remains feasible. This has been exemplified by successful initiatives in cities like Berlin, as documented by Matzing et al. (2017) and Šuvalija et al. (2021). These cases demonstrate that with effective strategies and stakeholder engagement, private land can indeed be leveraged for NBS implementation, contributing to overall urban resilience and sustainability.

1. Ecological feasibility

**a. Slope**

*Description of the raster map*

| **Feasibility** | **Value** |
| --- | --- |
| 1 | Slope < 6° |
| 0 | Slope > 6° |

*Rationale*

Slope creates higher runoff speed and prevents infiltration, which reduces the effectiveness of Sustainable Drainage Systems (SUDS). Accordingly, the Barcelona SUDS Commission recommends a maximum slope of 6° (Comissió de SUDS de l’Ajuntament de Barcelona, 2020).

1. Technological feasibility

1. **Distance to buildings**

*Description of the raster map*

| **Feasibility** | **Value** |
| --- | --- |
| 1 | Above 3m buffer from buildings |
| 0 | Within 3m buffer from buildings |

*Rationale*

Increased infiltration and saturation of the soil can lead to damages and destabilization of buildings and other structural bases. An appropriate distance should thus be kept between newly installed NBS and existing structures (Comissió de SUDS de l’Ajuntament de Barcelona, 2020). This distance is typically chosen depending on the width of the building. Since we could not find available data on building width, we assumed a 3m buffer using the Open Street Map (www.openstreetmap.org) buildings database.

**b. Underground structures**

*Description of the raster map*

| **Feasibility** | **Value** |
| --- | --- |
| 1 | No underground structures |
| 0 | Presence of underground structures (metro and car tunnel, train station, underground parking) |

*Rationale*

Similarly, underground infrastructures can get damaged or destabilized by increased infiltration of water and pollutants. Besides, a high density of underground structures and services limits the availability of space for additional underground infrastructure needed for the NBS, such as underdrains (Comissió de SUDS de l’Ajuntament de Barcelona, 2020).

**c. Rooftop slope**

*Description of the raster map*

| **Feasibility** | **Value** |
| --- | --- |
| 1 | <15° |
| 0.5 | 15-45° |
| 0 | >45° |

*Rationale*

Similar to ground slope, rooftop slope creates higher runoff speeds and reduces retention capacity. Further, steep inclination leads to structurally instable constructions, requiring additional anti-slip measures (Comissió de SUDS de l’Ajuntament de Barcelona, 2020). Extensive green roofs can be installed until a slope of 45%, but steeper inclinations than 15% require additional anti-slip measures which increases the construction efforts (Matzing et al., 2017). Intensive green roofs with a thick soil and vegetation cover require flatter roofs of maximum 5% inclination (Comissió de SUDS de l’Ajuntament de Barcelona, 2020)
