# Supplementary material
Source: Research Square preprint supplement (doi:10.21203/rs.3.rs-9072391/v1)
Supplement: Supplementary file 2 [file 7b1d4cea977856b6035677c3.docx]

**Appendix D. Table of results of OAT sensitivity analysis**

**One-at-a-time (OAT) sensitivity analysis**

The table presents the base, upper (up), and lower (down) values of each indicator after varying one parameter at a time while holding others constant. Acronyms: SA – Social Aceptance; GRAS – Green Roof Administrative Suitability; GRLU – Green Roof Land Use; GRS – Green Roof Slope; US – Underground Structures; DB – Distance to Buildingsn; UPLU – Urban Parks Land Use; PPLU – Permeable Pavements Land Use; RGLU – Rain Gardens Land Use; GS – Ground Slope. FD – Flood Depth; PD – Population Density; GA – Green Area; DTT – Daytime Temperature during Heatwave; IS – Impervious Surface; SL – Slope.

| **indicator** | **base** | **up** | **down** |
| --- | --- | --- | --- |
| **SA** | 0.9371963795100631 | 1.0309160174610692 | 0.8434767415590569 |
| **GRAS** | 0.21565003481501463 | 0.2372150382965161 | 0.19408503133351318 |
| **GRLU** | 0.2675045901567299 | 0.2942550491724029 | 0.2407541311410569 |
| **GRS** | 0.14587095393583627 | 0.1604580493294199 | 0.13128385854225266 |
| **US** | 0.8685972876968591 | 0.9554570164665449 | 0.7817375589271732 |
| **DB** | 0.6850296824185732 | 0.7535326506604305 | 0.6165267141767158 |
| **UPLU** | 0.24329448823671984 | 0.2676239370603919 | 0.21896503941304785 |
| **PPLU** | 0.11222096858423931 | 0.12344306544266326 | 0.10099887172581537 |
| **RGLU** | 0.30366286211370663 | 0.3340291483250772 | 0.2732965759023359 |
| **GS** | 0.6224068392500784 | 0.6846475231750863 | 0.5601661553250705 |

Table 1. Results of One-At-a-Time (OAT) sensitivity analysis for the feasibility assessment indicators in Barcelona

| **indicator** | **base** | **up** | **down** |
| --- | --- | --- | --- |
| **FD** | 0.011405288502590871 | 0.011405288502590871 | 0.011405288502590871 |
| **PD** | 0.011405288502590871 | 0.011405288502590871 | 0.011405288502590871 |
| **GA** | 0.011405288502590871 | 0.011405288502590871 | 0.011405288502590871 |
| **DTT** | 0.011405288502590871 | 0.011405288502590871 | 0.011405288502590871 |
| **IS** | 0.011405288502590871 | 0.011405288502590871 | 0.011405288502590871 |
| **SL** | 0.011405288502590871 | 0.011405288502590871 | 0.011405288502590871 |

Table 2. Results of One-At-a-Time (OAT) sensitivity analysis for the risk assessment indicators in Barcelona

| **indicator** | **base** | **up** | **down** |
| --- | --- | --- | --- |
| **SA** | 0.8023979894883413 | 0.8826377884371756 | 0.7221581905395072 |
| **GRAS** | 0.9961991592126429 | 1.0958190751339072 | 0.896579 |
| **GRLU** | 0.7144455264562332 | 0.7858900791018565 | 0.6430009738106099 |
| **GRS** | 0.12209963029024117 | 0.13430959331926529 | 0.10988966726121707 |
| **US** | 0.13845603305054635 | 0.15230163635560098 | 0.12461042974549172 |
| **DB** | 0.587733 | 0.6465057850167477 | 0.5289592786500664 |
| **UPLU** | 0.9303806424956874 | 1.023418706745256 | 0.8373425782461187 |

Table 3. Results of One-At-a-Time (OAT) sensitivity analysis for the feasibility assessment indicators in Boston

| **indicator** | **base** | **up** | **down** |
| --- | --- | --- | --- |
| **FD** | 0.005938 | 0.005938 | 0.005938 |
| **PD** | 0.005938 | 0.005938 | 0.005938 |
| **GA** | 0.005938 | 0.005938 | 0.005938 |
| **DTT** | 0.005938 | 0.005938 | 0.005938 |
| **IS** | 0.005938 | 0.005938 | 0.005938 |
| **SL** | 0.005938 | 0.005938 | 0.005938 |

Table 4. Results of One-At-a-Time (OAT) sensitivity analysis for the risk assessment indicators in Boston

| **indicator** | **base** | **up** | **down** |
| --- | --- | --- | --- |
| **SA** | 0.8386615478040317 | 0.9225277025844348 | 0.7547953930236287 |
| **GRAS** | 0.6427382784510964 | 0.7070121062962061 | 0.5784644506059868 |
| **GRLU** | 0.10872325254453595 | 0.11959557779898954 | 0.097851 |
| **GRS** | 0.6030606821729931 | 0.6633667503902925 | 0.5427546139556938 |
| **US** | 0.9501927678512109 | 1.045212044636332 | 0.855173 |
| **DB** | 0.8203092665548788 | 0.9023401932103667 | 0.7382783398993912 |
| **UPLU** | 0.3044502864472148 | 0.33489531509193626 | 0.2740052578024933 |
| **PPLU** | 0.10224327458267286 | 0.11246760204094017 | 0.092019 |
| **RGLU** | 0.308867 | 0.3397534119596694 | 0.2779800643306386 |
| **GS** | 0.6388545337425072 | 0.70274 | 0.5749690803682566 |

Table 5. Results of One-At-a-Time (OAT) sensitivity analysis for the feasibility assessment indicators in Rotterdam

| **indicator** | **base** | **up** | **down** |
| --- | --- | --- | --- |
| **FD** | 0.072511 | 0.072511 | 0.072511 |
| **PD** | 0.072511 | 0.072511 | 0.072511 |
| **GA** | 0.072511 | 0.072511 | 0.072511 |
| **DTT** | 0.072511 | 0.072511 | 0.072511 |
| **IS** | 0.072511 | 0.072511 | 0.072511 |
| **SL** | 0.072511 | 0.072511 | 0.072511 |

Table 6. Results of One-At-a-Time (OAT) sensitivity analysis for the risk assessment indicators in Rotterdam

Sensitivity across aggregation operators

**Table 7** provides a concise synthesis of the aggregation-rule sensitivity analysis based on the normalized detailed outputs. For each case study and composite index, we report the number of spatial units evaluated and summary robustness metrics computed across alternative aggregation operators, including the mean/median/90th-percentile range of composite scores, along with the mean standard deviation (SD) and coefficient of variation (CV) across methods. To distinguish typical aggregation choices from boundary-case stress tests, metrics are reported both for the full operator set (including minimum/maximum and extreme power means) and for a core set of standard averaging operators (arithmetic, geometric, harmonic, quadratic, and median). Finally, rank robustness is summarized using Spearman correlations between each operator and the arithmetic-mean baseline, indicating the extent to which spatial ordering is preserved under alternative compensability assumptions.

| case_study | index_name | n_units | all_mean_range | all_median_range | all_p90_range | all_mean_sd | all_mean_cv | core_mean_range | core_median_range | core_p90_range | core_mean_sd | core_mean_cv | spearman_mean_vs_arithmetic | spearman_min_vs_arithmetic | spearman_max_vs_arithmetic |
| --- | --- | --- | --- | --- | --- | --- | --- | --- | --- | --- | --- | --- | --- | --- | --- |
| Barcelona | SET_vulnerability | 12443 | 0.51 | 0.508 | 0.753 | 0.171 | 0.641 | 0.272 | 0.281 | 0.408 | 0.112 | 0.484 | 0.872 | 0.764 | 0.965 |
| Barcelona | risk_flood | 4856 | 0.515 | 0.49 | 0.91 | 0.179 | 0.789 | 0.286 | 0.269 | 0.537 | 0.123 | 0.642 | 0.626 | 0.35 | 0.909 |
| Barcelona | risk_heat | 12443 | 0.516 | 0.48 | 0.876 | 0.18 | 0.765 | 0.295 | 0.28 | 0.515 | 0.126 | 0.619 | 0.723 | 0.513 | 0.939 |
| Boston | SET_vulnerability | 15669 | 0.882 | 0.88 | 0.953 | 0.299 | 0.913 | 0.456 | 0.45 | 0.524 | 0.189 | 0.714 | 0.612 | 0.284 | 0.929 |
| Boston | risk_flood | 3412 | 0.99 | 0.993 | 1.0 | 0.358 | 1.154 | 0.579 | 0.569 | 0.581 | 0.252 | 1.094 | 0.808 | 0.579 | 0.996 |
| Boston | risk_heat | 14628 | 0.428 | 0.42 | 0.702 | 0.14 | 0.744 | 0.204 | 0.194 | 0.343 | 0.084 | 0.545 | 0.857 | 0.717 | 0.985 |
| Rotterdam | SET_vulnerability | 27509 | 0.496 | 0.494 | 0.71 | 0.157 | 0.517 | 0.22 | 0.19 | 0.415 | 0.092 | 0.375 | 0.895 | 0.695 | 0.957 |
| Rotterdam | risk_flood | 17014 | 0.386 | 0.364 | 0.626 | 0.13 | 0.681 | 0.203 | 0.184 | 0.359 | 0.085 | 0.514 | 0.833 | 0.683 | 0.965 |
| Rotterdam | risk_heat | 17014 | 0.272 | 0.254 | 0.435 | 0.085 | 0.369 | 0.118 | 0.082 | 0.236 | 0.049 | 0.253 | 0.926 | 0.843 | 0.987 |
