# Supplementary material
Source: Research Square preprint supplement (doi:10.21203/rs.3.rs-9072391/v1)
Supplement: Supplementary file 3 [file cfecbb17b9949d634f967fee.docx]

**Appendix A Detailed explanation and formulas used for normalization and aggregation of SETS Vulnerabilities, Risk and Feasibility index calculation**

1. **Risk Calculation**

**IPCC 2012 Risk perspective:**

Hazard is defined as the potential to cause significant disruption or damage, including harm to infrastructure, interruptions to essential services, risks to public health and safety, and economic losses. In this study, hazards are represented by outputs from pluvial flood modeling and simulated daytime temperatures during heatwave events. Exposure refers to the presence of people within hazard-prone areas, acknowledging the associated risks such as property damage, injury, and mobility disruption during flood events, as well as heat-related illnesses, exacerbation of pre-existing health conditions, reduced labor productivity, and limited access to cooling resources during heatwaves. It is quantified using population density metrics. Vulnerability is assessed across the three SETS dimensions. Social vulnerability is evaluated using demographic and socioeconomic indicators, including age distribution, income levels, and language proficiency. Ecological vulnerability considers environmental features that influence an area’s capacity to retain water and mitigate heat through evapotranspiration. Technological vulnerability pertains to the characteristics of the built environment, specifically, the extent of impervious surfaces and terrain slope in the context of flooding, and impervious surface coverage in relation to heat accumulation by concrete.

**Social Domain Vulnerability Indicators**

Given the variation in census block population, we used rates representing the percentage of the total population of each census block. Subsequently, the converted indicator values were normalized within a 0 to 1 range using the provided minimum-maximum rescaling formula (1).

(1)

Where Yi = normalized value of indicator Xi for all i=1,. . .,n.

The next step was estimating the vulnerability score (Vs) using normalized values with the following formula (2):

(2)

Where Vs - vulnerability score, =1 and 0 ≤ wi ≤ 1, for all i=1,. . .,n, and w is the weight (equal weight inside each SETS domain) associated with a normalized value (I) for the indicator Yi, and q is the number of indicators.

The final step was converting the data into raster format with spatial resolution 40 m for seamless integration with the ecological and technological vulnerability domains.

**Ecological and Technological Domains Vulnerability Indicators**

The data, initially presented in vector format, was converted into raster format with a spatial resolution of 40 m for integration, ensuring that values were reflected where needed. For instance, in the indicator "presence of wetlands," values were assigned based on wetland area (e.g., a value of 1 for wetland locations and 0 for the remaining areas). Finally, all indicators were normalized from 0 to 1, facilitating integration across different scales and units through the application of formula (1).

Subsequently, for each dimension group, we calculated the mean value, assigning equal weight to each indicator. This was achieved using the raster calculator function to identify the vulnerability score for each pixel (2). The next step involved rescaling the vulnerability score to ensure it fell within the specified range of 0 to 1 by applying the min-max formula (1). In this score, a value of 0 denotes minimal vulnerability, while a value of 1 signifies the utmost vulnerability.

**Data aggregation**

The subsequent step involved creating an aggregated SETS vulnerability index. The geometric mean value for each pixel (Fig. 3) was identified, consolidating the diverse SETS vulnerabilities into a unified vulnerability index. This was achieved by utilizing the cell statistic function in Arc Pro. All indicators were equally weighted in the social, environmental, and technological domains.

To determine the risk associated with heat and pluvial flood, the risk index was calculated by integrating hazard, vulnerability and exposure. SETS vulnerability maps, hazard maps, and exposure maps were combined to generate a unified risk score. The calculation of the risk score was executed using formula (4).

(4)

This approach ensures a balanced consideration of hazard, vulnerability and exposure factors in the final risk assessment. The resulting risk score maps provide a spatially explicit representation of the heat and pluvial flood risk, offering valuable insights into the overall risk landscape associated with water-related hazards.

1. **Feasibility Calculation**

ArcPro version 3.32 is used for this assessment. Spatially explicit data for each indicator is collected (see Table 1) and converted into raster format, classifying each area into three categories: 0, 0.5, or 1. A suitability value of 0 denotes non-feasible areas for implementing the considered NbS type, 0.5 represents areas where implementation is feasible, but requires significant site modifications, and 1 indicates areas that are both feasible and well-suited for NbS implementation. A detailed explanation and justification of the threshold values are provided in Appendix B.

The next step involves aggregating the indicators into final feasibility maps for each NbS type using geometric mean aggregation. The geometric mean (5) is chosen to retain 0 values and limit the influence of outlier values, ensuring that non-feasible areas are accurately represented.

(5)

Where Fs(R) - rescaling feasibility score, and I1*I2*I3…xn – indicators used for each type of NbS.

The final feasibility maps for NbS implementation were based on a normalized scoring system ranging from 0 to 1, where a score of 0 indicates no feasibility and 1 represents the highest feasibility. This continuous scale was divided into five equal quantile groups to facilitate interpretation and comparison. To spatially standardize the results, the final feasibility scores, along with the indices used in their calculation, were transferred to a 100 m × 100 m grid using the Zonal Statistics tool in ArcGIS Pro. The mean value of each grid cell was calculated based on the overlay raster.
