# Supplementary material
Source: Research Square preprint supplement (doi:10.21203/rs.3.rs-9072391/v1)
Supplement: Supplementary file 4 [file e970c9a1fef4087edcea11b5.docx]

**Appendix C. Table of data sources for risk and feasibility assessment for three case-studies**

| **Index** | **Indicator** | **Data source (BCN)** | **Data source (BOS)** | **Data source (ROT)** |
| --- | --- | --- | --- | --- |
| **Hazard** | | Flood depth (mm) | | --- |  |  | | --- | | PDISBA (2019); RESCCUE Project | | MassGIS | | --- | | | Klimaateffectatlas | | --- | |
| Daytime temperature during heatwave | Model Ventura et al. (2025) | City of Boston (2025) – Heat Resilience Solutions | Atlas Leefomgeving |
| **Exposure** | Population density (people/m²) | National Statistical Institute (Instituto Nacional de Estadística) | U.S. Census Bureau | Centraal Bureau voor de Statistiek (CBS, 2023a) |
| | **Vulnerability**  **Social** | | --- | | Senior population (%) | National Statistical Institute (Instituto Nacional de Estadística) | U.S. Census Bureau | Centraal Bureau voor de Statistiek (CBS, 2023a) |
| Minor population (%) | National Statistical Institute (Instituto Nacional de Estadística) | U.S. Census Bureau | Centraal Bureau voor de Statistiek (CBS, 2023a) |
| |  | | --- |  | Communities with limited language skills and unfamiliarity with local systems (% of population) | | --- | | Statistical Institute of Catalonia (2019) – [IDESCAT](https://www.idescat.cat/) | U.S. Census Bureau | Centraal Bureau voor de Statistiek (CBS, 2023a) |
| Population living below the poverty line (% of population | National Statistical Institute (Instituto Nacional de Estadística) | U.S. Census Bureau | Centraal Bureau voor de Statistiek (CBS, 2023a) |
| **Vulnerability**  **Ecological** | Green areas (% of surface area) | EO browser | EO browser | Gemeente Rotterdam |
| **Vulnerability**  **Technological** | Slope greater than 20% (% of surface area) | Data was taken from IDEAMB | Infraestructura de Dades Espacials | MassGIS | NA |

Table 1. Overview of hazard, exposure, and vulnerability indicators and data sources for Barcelona (BCN), Boston (BOS), and Rotterdam (ROT).

| **Domain** | **Indicators** | **Data source (BCN)** | **Data source (BOS)** | **Data source (ROT)** |
| --- | --- | --- | --- | --- |
| Social | Social acceptance | Adjuntament Barcelona | NA | Gemeente Rotterdam |
| Administrative suitability | [https://ide.amb.cat/Visor/?locale=en (access 11.03.2025)](https://ide.amb.cat/Visor/?locale=en%20(access%2011.03.2025)) | NA |  |
| Current land use | Interactive map of Department of Territory, Housing and Ecological Transition Government of Catalonia | NA | BGT |
| Technological | Rooftop slope | [https://ide.amb.cat/Visor/?locale=en (access 11.03.2025)](https://ide.amb.cat/Visor/?locale=en%20(access%2011.03.2025)) | NA | AHN |

Table 2. Overview of feasibility indicators and data sources for Green roofs for Barcelona (BCN), Boston (BOS), and Rotterdam (ROT).

| **Domain** | **Indicators** | **Data source (BCN)** | **Data source (BOS)** | **Data source (ROT)** |
| --- | --- | --- | --- | --- |
| Social | Current land use | Interactive map of Department of Territory, Housing and Ecological Transition Government of Catalonia | Department of Innovation and Technology, Boston government | BGT |
| Social acceptance | Adjuntament Barcelona | City of Boston. (2025). *State and City of Boston election results* | Gemeente Rotterdam |
| Ecological | Ground Slope | IDEAMB | MassGIS | AHN |
| Technological | Distance Buildings | Open Street Map | MassGIS | BGT |
| Underground Structures |  | MBTA | Gemeente Rotterdam |

Table 3. Overview of feasibility indicators and data sources for rain gardens for Barcelona (BCN), Boston (BOS), and Rotterdam (ROT).

| **Domain** | **Indicators** | **Data source (BCN)** | **Data source (BOS)** | **Data source (ROT)** |
| --- | --- | --- | --- | --- |
| Social | Current land use | Interactive map of Department of Territory, Housing and Ecological Transition Government of Catalonia | Department of Innovation and Technology, Boston government | BGT |
| Social acceptance | Adjuntament Barcelona | City of Boston. (2025). *State and City of Boston election results* | Gemeente Rotterdam |
| Ecological | Ground Slope | IDEAMB | MassGIS | AHN |

Table 3. Overview of feasibility indicators and data sources for permeable pavement for Barcelona (BCN), Boston (BOS), and Rotterdam (ROT).

| **Domain** | **Indicators** | **Data source (BCN)** | **Data source (BOS)** | **Data source (ROT)** |
| --- | --- | --- | --- | --- |
| Social | Current land use | Interactive map of Department of Territory, Housing and Ecological Transition Government of Catalonia | Department of Innovation and Technology, Boston government | BGT |
| Social acceptance | Adjuntament Barcelona | City of Boston. (2025). *State and City of Boston election results* | Gemeente Rotterdam |
| Technological | Distance to buildings | Open Street Map | MassGIS | BGT |

Table 4. Overview of feasibility indicators and data sources for urban parks for Barcelona (BCN), Boston (BOS), and Rotterdam (ROT).
